# Supplementary material for: Influence of relative humidity on heterogeneous kinetics of NO2 on kaolin and hematite
Source: Royal Society of Chemistry journal article supplement (doi:10.1039/c5cp02223a), 2015-01-01
Supplement: c5cp02223a1.pdf [file c5cp02223a1.pdf]

## Influence of relative humidity on heterogeneous kinetics of $\text{NO}_2$ on kaolin and hematite

Yongchun Liu, Chong Han, Jinzhu Ma, Xiaolei Bao, Hong He\*

*State Key Joint Laboratory of Environment Simulation and Pollution Control,  
Research Center for Eco-Environmental Sciences, Chinese Academy of Sciences,  
Beijing, 100085, China.*

### Supporting information

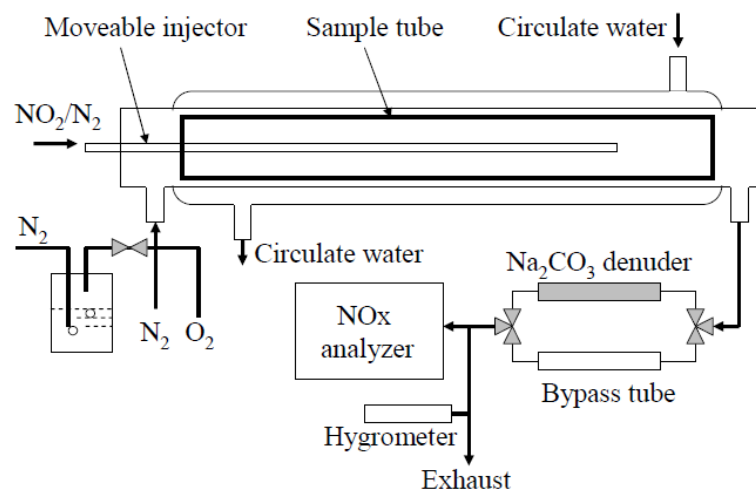

Figure S1. Diagram of the flow tube

---

\* Corresponding author phone: +86-10-62849123;  
fax: +86-10-62923563; email: honghe@rcees.ac.cn

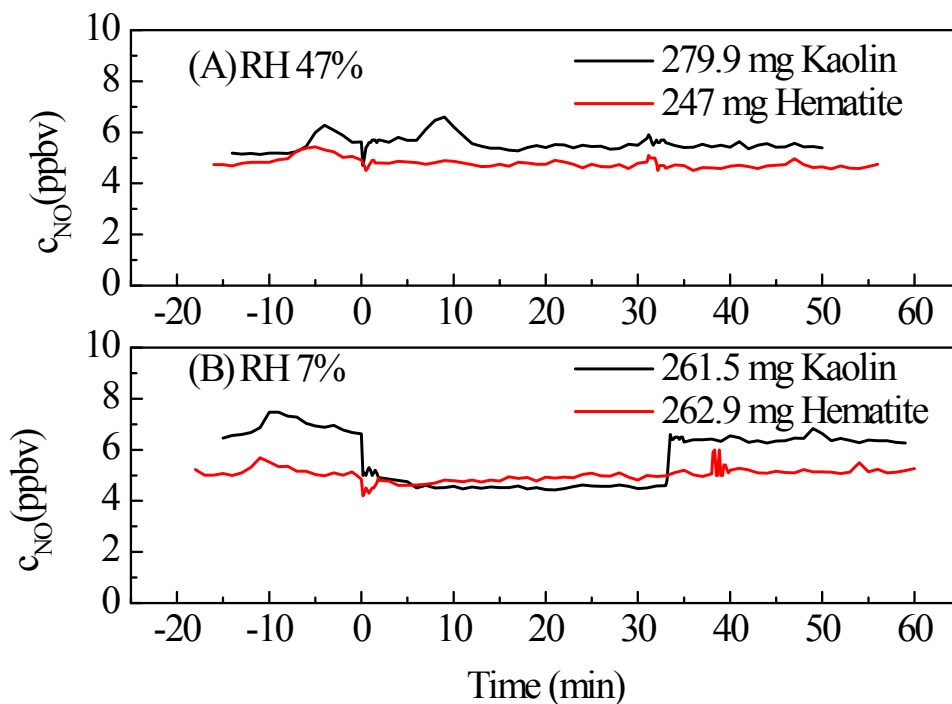

Figure S2. Evolution of NO concentrations with time during uptake of  $\text{NO}_2$  on kaolin and hematite at RH of (A) 47 % and (B) 7 %. At other relative humidities, the signal responses of NO on both kaolin and hematite were similar to those shown in (A).

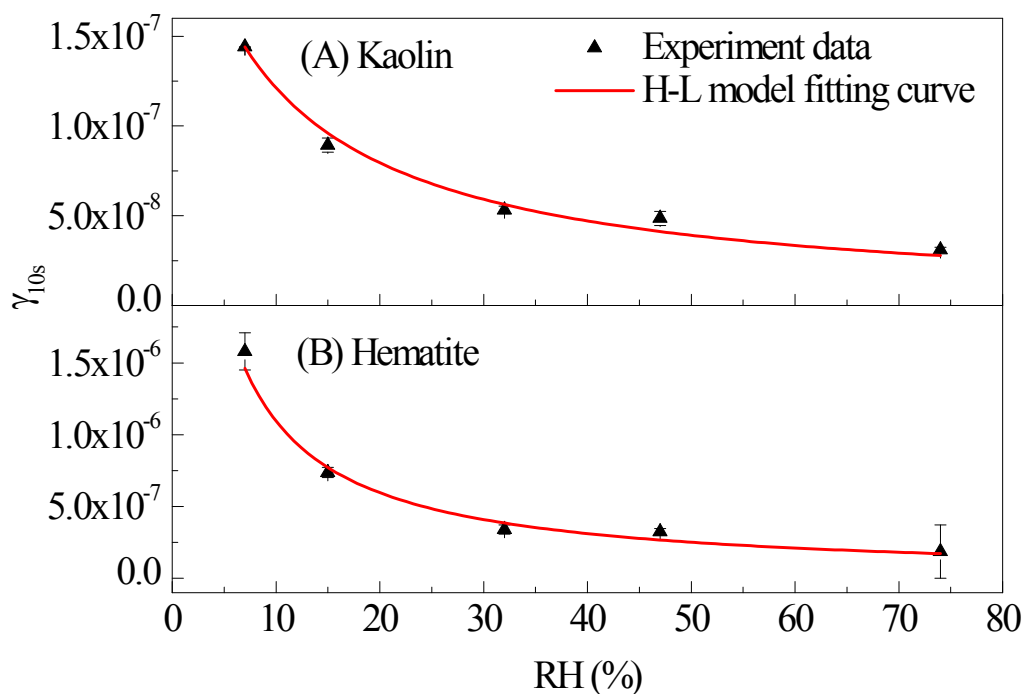

Figure S3. Modelling result assuming a Langmuir adsorption isotherm of water vapor and Langmuir-Hinshelwood reaction mechanism of  $\text{NO}_2$  on the particles.

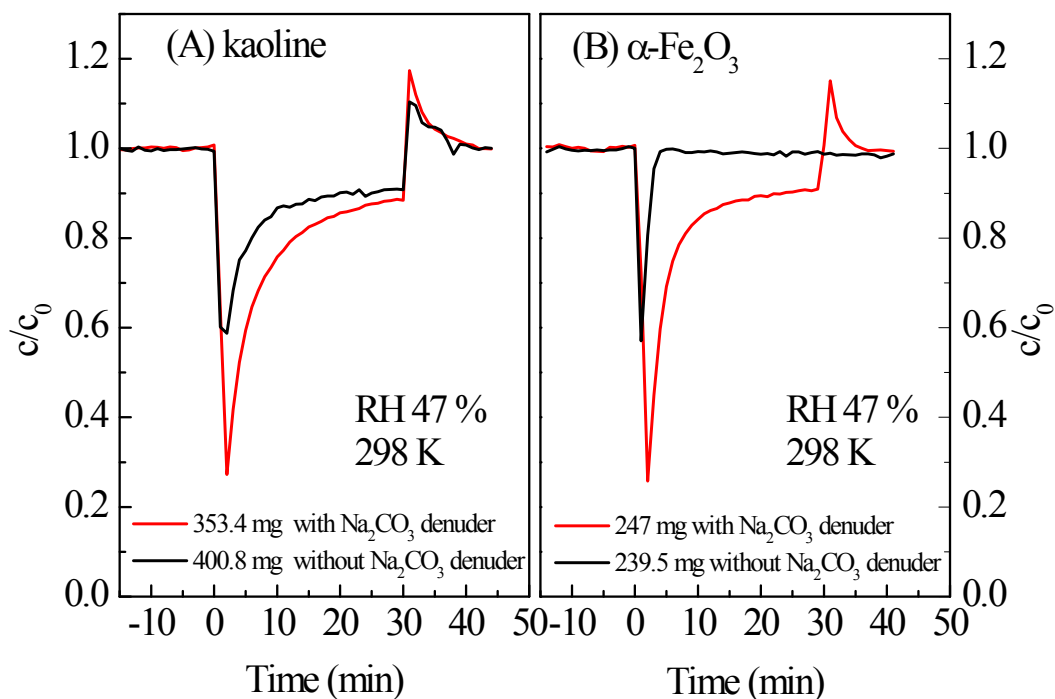

Figure S4. Comparison of the uptake curves of NO<sub>2</sub> with or without Na<sub>2</sub>CO<sub>3</sub> denuder at 298 K and at 47 % of RH. The time resolution is 1 min.

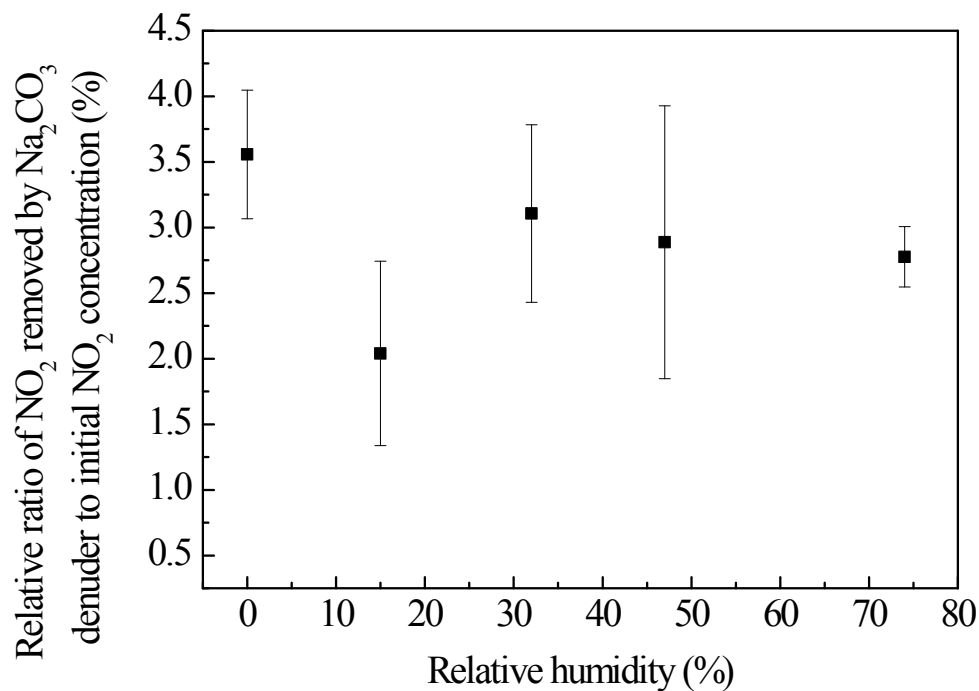

Figure S5. The relative ratio of NO<sub>2</sub> removed by Na<sub>2</sub>CO<sub>3</sub> denuder to the initial NO<sub>2</sub>

concentration at different RH.

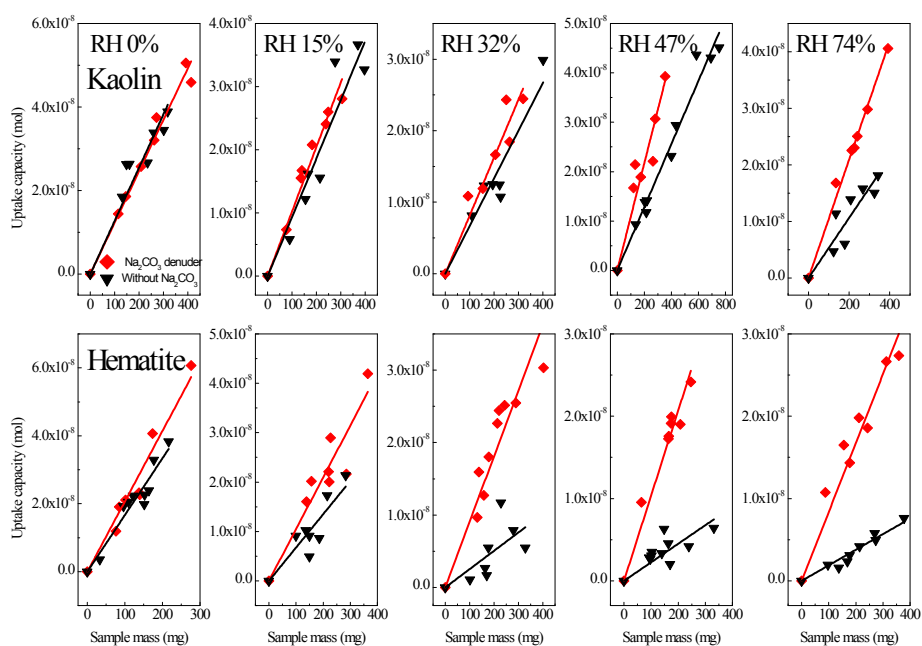

Figure S6. Linear mass dependence for integrated uptake capacity of  $\text{NO}_2$  within 30 min on kaolin and hematite at 298 K. The first row is for kaolin and the second row is for hematite.
